# Supplementary material
Source: Springer Nature journal article supplement (https://www.springermedizin.de/resource/supplementary/12885_2012_3810_MOESM2_ESM.pdf/9465898)
Supplement: MOESM2 [file 9465898]

Assessed for eligibility (n = 540)

Excluded (n = 319)

Curative intention (n = 107)

Not eligible tumors (n = 111)

Palliative intention, but therapy less than 3 months (n = 94)

Lost to follow up (n = 7)

Eligible patients (n = 221)

No participation or no response (n = 87)

Participants (n = 134)
